# Supplementary material for: More than news! Mapping the deliberative potential of a political online ecosystem with digital trace data
Source: Springer Nature journal article supplement (doi:10.1057/s41599-024-03115-0), 2024-05-15
Supplement: MOESM1 [file 41599_2024_3115_MOESM1_ESM.pdf]

Supplementary information for:  
More than news! Mapping the deliberative potential of a  
political online ecosystem with digital trace data

Lisa Oswald  
Center for Adaptive Rationality  
Max Planck Institute for Human Development  
Berlin  
Germany

**Appendix A**  
**Methodological Details**

**Political website identification**

In order to capture every potentially relevant website visit, an extensive dictionary of political topics, in particular topics within the public discourse in 2017, was compiled to classify the full sample of URLs. While most studies in the field of online media research operate on the domain or subdomain level (Guess, 2021), I use the full text of URLs for this classification step.

Keywords capturing potentially political topics were collected from a range of source websites, for example the federal center for political education (Federal Agency for Civic Education, 2017) and various news articles discussing relevant issues for the 2017 federal election in Germany (see SI D). I went through the full text of those articles and collected keywords until the dictionary appeared ‘saturated’ because with further keyword collection, majorly duplicates appeared<sup>1</sup>. Instead of limiting the analytical focus a-priorily, this procedure ensures that as many sites as possible that are potentially relevant for the public discourse are captured. The first version of the dictionary included 266 keywords<sup>2</sup>. Using this list, I ran the filter query to select the potentially political URLs. In a next step, grouped by domains, the output was checked manually for face validity on the website level (by visiting the URL). More specifically, I checked whether the websites were actually featuring political topics or discussions and if not, I tried to identify the keyword that mistakenly selected this website. I then excluded a considerable set of keywords from the dictionary, to sharpen the query. I also added a layer of exclusions to the query, for example I include URLs with the keyword ‘petition’ but exclude ‘competition’. I repeated this man-

---

<sup>1</sup>I also tried scraping the full text of websites and processing it with various automated text mining approaches to extract keywords in a semi-automated way. However, those resulting keyword sets appeared much less useful which I attribute to substantive parts of text being embedded in graphics which cannot be scraped easily with an html-based text extraction process. Therefore, and facing a small number of dense websites, I opted for a manual approach of keyword extraction.

<sup>2</sup>Words including German Umlaute like ‘ä’, ‘ö’ and ‘ü’, I included as is, as ‘ae’, ‘oe’ and ‘ue’, and in UTF-8 hexadecimal encoding.

ual cross validation step repeatedly, until I did not find any more systematic mismatches (false positives). The final dictionary and the list of exclusions can be found in SI (D).

Furthermore, since many keywords (such as family, rent and finance) also appear in many non-political contexts, all website visits that were previously classified as irrelevant category<sup>3</sup> were excluded from the set of relevant URLs. Search engines were kept in the dataset as information-providers when people searched for political topics, even though they often only work as mediators and do not provide information themselves. However, political information seeking is largely considered as highly important digital feature of the overall democratic process, to the extent that it can be used to predict elections (Salem & Stephany, 2020).

### Latent Class Analysis

The latent class model probabilistically assigns each website to a ‘latent class’, which in turn produces expectations about how that website will score on each of the manifest deliberative criteria that constitute the six dimensions of deliberative potential (Linzer & Lewis, 2011). Accordingly, websites within the same latent class are similar on certain dimensions, while those in different latent classes are dissimilar from each other in some significant way.

The parameters of the latent class model,  $p_r$  and  $\pi_{jrk}$  as prior and class-conditional outcome probabilities that each individual belongs to each class, are iteratively estimated by an EM-Algorithm (estimation maximization). In a first step, class-membership probabilities are estimated, while in a second step those estimates are altered to maximize the likelihood-function

$$\ln L = \sum_{i=1}^N \ln \sum_{r=1}^R p_r \prod_{j=1}^J \prod_{k=1}^{K_j} (\pi_{jrk})^{Y_{ijk}}. \quad (\text{A1})$$

With  $N$  representing the number of observations (websites) and  $J$  representing the manifest variables (deliberative criteria) with  $K$  possible outcomes (present or not present).  $R$  represents the outcome probabilities which are fixed prior to estimation.

Both steps are iteratively repeated until the global maximum is found (Ohlsen, 2015). I fitted the latent class models with the `poLCA::poLCA()` R function (Linzer & Lewis, 2011), which suits the categorical assessment of the criteria for deliberative potential. In this case, the number of classes in the sample is not theoretically defined but identified through the consideration of the smallest Bayesian Information Criterion (BIC). Ideally, the identified model should have the smallest number of classes possible while maintaining a low classification error Díaz and Koutra (2013).

I had no prior theoretical expectations about the number of latent classes and therefore, started to fit an ‘independence’ model with one latent class (Linzer & Lewis, 2011) and then iteratively increased the number of latent classes by one up to a number of 10 latent classes.

<sup>3</sup>irrelevant domain categories identified in the first round of top 1000 domain coding: astrology, banking, cashback, cooking, dating, file-hosting, function, gambling, mail, micro-job, porn, shopping, sport, survey, tracking, transport, travel, uni, work

Considering various model fit criteria a model with three latent classes was selected (Lin & Dayton, 1997). The model fit criteria were very similar between a two-class and a three-class solution. I therefore also present results for the two class solution in SI but stick with the three-class solution in the main body of the text. I validated the model (a) using a split-sample approach, randomly cutting 50% of the sample with no considerable effects to the latent class solution (see SI C10) and (b) by making changes to the input criteria (Bacher & Vermunt, 2010). Dropping criteria from the model input that do not differ substantially within a class (in this case, age and educational inclusivity and party preference heterogeneity), does also not significantly change the results (see SI C9). The classes still show the same characteristics and relative sizes, with only minor changes in the individual class memberships of websites.

As another robustness check, the supply side criteria (information, communication and participation) and the demand side criteria (connectivity, inclusivity and heterogeneity) were also considered separately in two LCA models, as they form two natural, methodological groups. For the computationally coded, demand side criteria, a simple two factor solution was suggested with one class including all websites with high probabilities of fulfilling each criterion and one class with overall very low scores for connectivity, inclusivity and heterogeneity in other words, high and low engagement websites. The model including only the manually coded infrastructural criteria of information, communication and participation possibilities suggested a more interesting pattern that is in line with the findings from the main model including all criteria. A first class contains websites with a strong information profile, including all public broadcasting pages. A second class contains websites with an especially strong forum component or communication profile with pages that also enable participation to some extent. The last class is rather a residual class including websites with overall low probabilities of fulfilling any criteria.

### Shannon-Wiener Index

Entropy-based diversity indices such as the here applied Shannon-Wiener index (Dixon, 2003; Grafton et al., 2012; Kiernan, 2014; Oksanen, 2013) are regularly used in the context of bio-diversity assessments, combining measures of richness (the number of categories) and evenness (similar frequencies of categories).

$$H = - \sum_{i=1}^S p_i \ln p_i \quad (\text{A2})$$

with  $p_i$  being the proportion of category  $i$ ,  $S$  being the number of categories so that  $\sum_{i=1}^S p_i = 1$  (Oksanen, 2013).

## Appendix B Information on the Survey and Tracking Data

### Sampling

The survey was administrated by YouGov combining purposive sampling with a multi-stage sample-matching and weighting procedure (Rivers, 2006). First, the target

population, the German online population, was defined. For the panel, data on demographic marginals (gender, age and educational attainment) from Best for Planning (2017) were used, who conducted 30,000 face-to-face interviews to evaluate the German online population. A stratified sample was drawn from this frame and matched as closely as possible to YouGov’s longstanding panel (with over a million members) (Munzert et al., 2021, same data).

The resulting target sample constitutes a representative set of respondents in terms of traditional sampling theory. However, respondents might be hard to contact because they either have never reported their contact details or do not agree to the terms of the survey. Hence, multi-stage matching was applied, combining the representative target sample with YouGov’s longstanding panel of reliable respondents. From this panel, a sample of individuals was selected that matches as closely as possible the distribution of the target sample and had opted in to providing website visit data (see below). Through this procedure, YouGov guarantees not only a minimum of 1,000 respondents in the survey, but also the inclusion of hard-to-reach population subgroups (Munzert et al., 2021).

## Survey Design and Fielding

All data was gathered by YouGov from July 1 to December 9, 2017. The panel was made up of five waves. The survey covered a wide range of topics such as people’s political preferences, political knowledge on several domains, their general attitudes towards politics, opinions on particular parties, and what people think of the election campaign (the federal elections were held on September 24, 2017) (Munzert et al., 2021, same survey).

## Passive Metering Technology

Wakoopa, the tracking software used by YouGov in this study, ran in the background of panelists’ devices and collected anonymized visit data. There are no technological limits to the types of websites that can be included in the data. Moreover, the software tracks web traffic (passwords and financial transactions are ignored) for all browsers installed on a user’s computer. The technology does not slow the performance of users’ computers and is transparent about the data that is being sent: Panelists can see a list of the last several captured URLs and can also pause tracking for 15 minutes. Of course, they can also uninstall the software at any time. YouGov encourages its panelists to install the software on as many devices as possible, including laptops, mobile phones, and tablets. The capabilities for mobile tracking are somewhat more limited for privacy reasons, but data on domain-level visits and app use are collected (Munzert et al., 2021, same data).

Panelists were recruited from YouGov’s traditional participant pool via incentives. The company reports fairly strong incentives: 4,000 “points” for signing up and downloading the Wakoopa software—roughly 8 times the number offered for a typical survey—and 1,000 additional points every month. Participants in online surveys can redeem these points for clothing, prepaid gift cards, and other merchandise. One consequence of this recruitment strategy is that YouGov Pulse users are a subset of the overall panel, making sampling somewhat more challenging (Munzert et al., 2021).

## **Privacy and Ethical Considerations of Data**

Combining survey data and digital trace data of the same respondents has substantive merits to understand the effects of online exposure on people's attitudes and behavior. However, it entails challenging tasks for the protection of privacy and raises ethical questions, as users may not be aware of how their data are being used. Even with the consent of the participants, it still could be problematic because the account names and meta-information of social media accounts can be identifiable and linked to their survey responses (Stier et al., 2020). Thus, it is important to communicate these concerns as clearly as possible when collecting data (Menchen–Trevino, 2013). In every step of data collection, participants were informed about the scope of data collection, data management, confidentiality, and research purpose. Explicit and informed consent was obtained from all participants whose data was collected (Munzert et al., 2021, same considerations).

Regarding the web-tracking data, YouGov received the consent from the panel that their web browsing data can be linked to other survey items they have participated. They highlighted that participants have complete control over which data they share for research purposes. Participants can choose which information they want to share, pause the tracking app when they want, and withdraw their consent anytime. After data collection, YouGov removed any personally identifying information and sensitive data (e.g., financial transaction) and stripped-out geocoding information that is too specific before delivering the data to researchers. The deliverables are de-identified and anonymized and fully comply with the EU's General Data Protection Regulation (GDPR) requirements (Munzert et al., 2021).

## Appendix C Supporting Tables and Figures

**Figure C1**

*Engagement with different classes of sites*

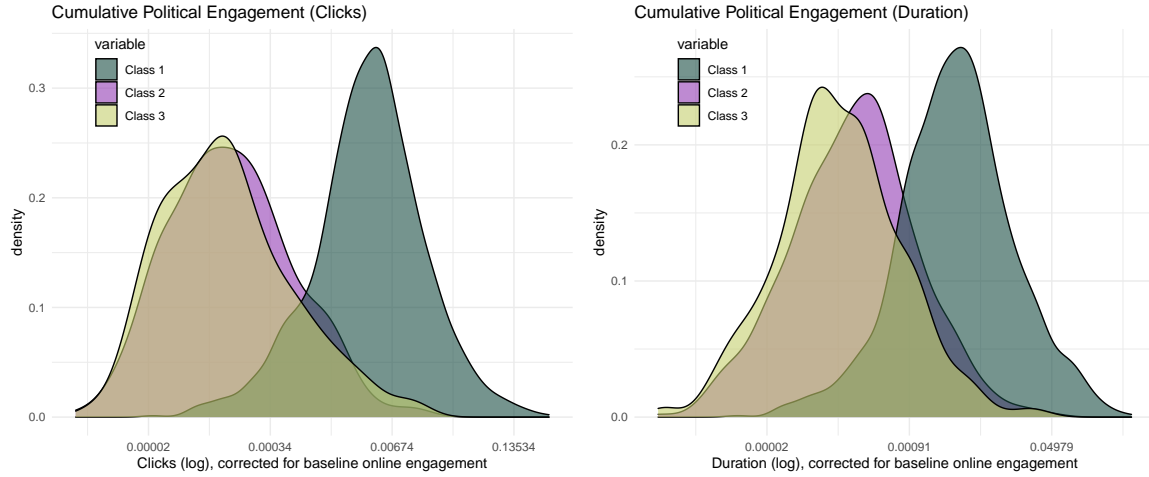

(a) Number of website visits, baseline corrected. (b) Duration, baseline corrected.

*Note. Based on response probability patterns and class membership, class 1 was named ‘mainstream hubs’, class 2 was named ‘quality information providers’ and class 3 was named ‘niche forums’.*

**Figure C2**

*Engagement with online news and social media*

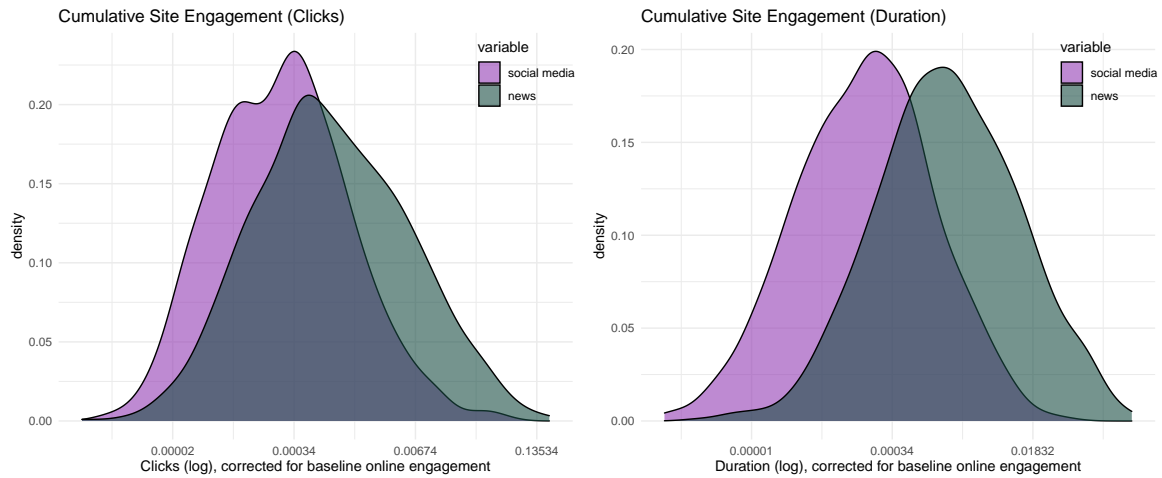

(a) Number of website visits, baseline corrected. (b) Duration, baseline corrected.

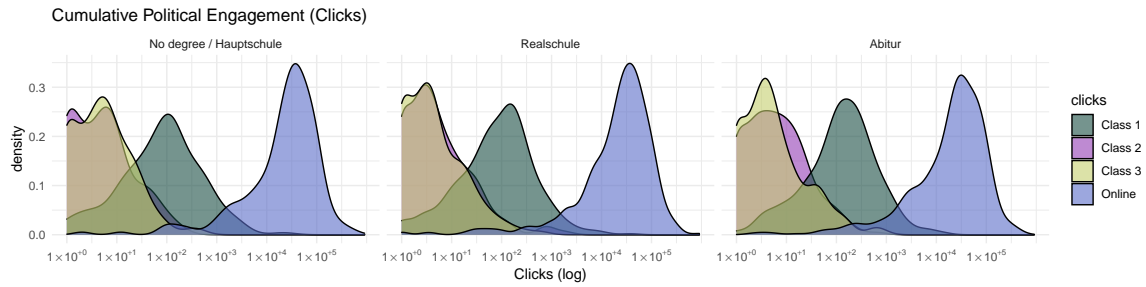

**Figure C3**

*Engagement with different classes of sites by level of formal education. Class 1: ‘mainstream hubs’, class 2: ‘quality information providers’ and class 3: ‘niche forums’.*

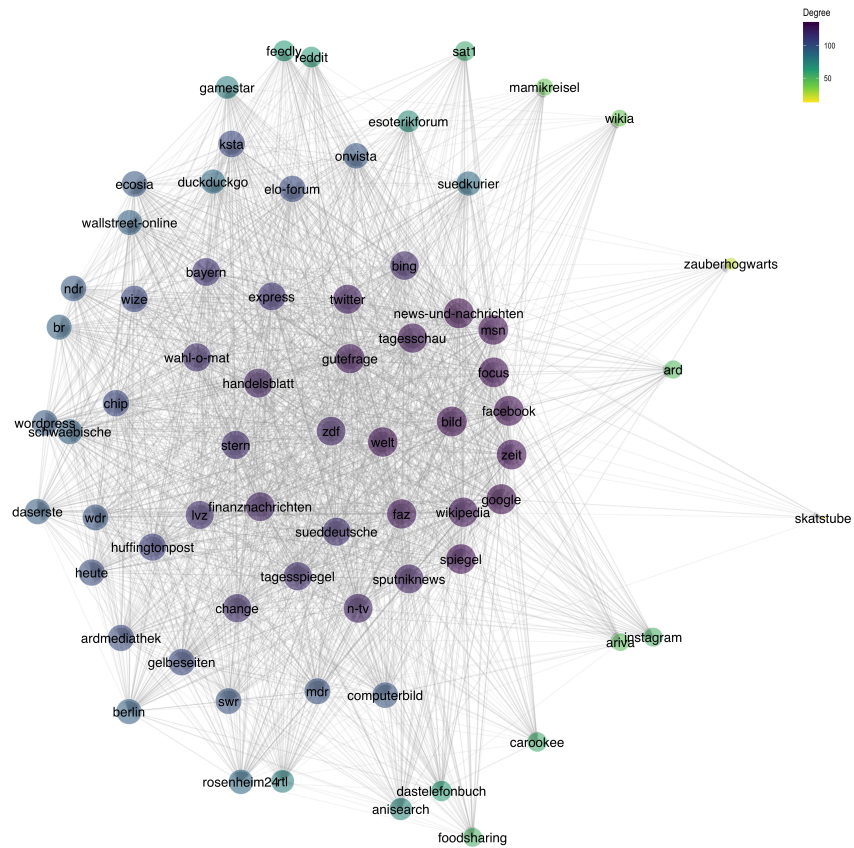

**Figure C4**

*Connectivity - quantitative measure of ingoing and outgoing traffic from other relevant sites.*

**Table C1***Class Memberships*

| <b>C3 domains</b> | clicks | <b>C1 domains</b>    | clicks | <b>C2 domains</b> | clicks |
|-------------------|--------|----------------------|--------|-------------------|--------|
| elo-forum         | 1208   | google               | 102926 | heute             | 1179   |
| computerbild      | 1151   | news-und-nachrichten | 49265  | swr               | 1129   |
| duckduckgo        | 845    | bild                 | 36771  | suedkurier        | 1068   |
| ecosia            | 807    | facebook             | 31592  | ksta              | 1040   |
| wordpress         | 785    | wahl-o-mat           | 30046  | schwaebische      | 912    |
| wallstreet-online | 711    | msn                  | 29460  | daserste          | 896    |
| onvista           | 646    | focus                | 27413  | berlin            | 894    |
| gamestar          | 595    | welt                 | 18819  | wdr               | 883    |
| esoterikforum     | 253    | twitter              | 17566  | ndr               | 831    |
| instagram         | 228    | zeit                 | 16609  | mdr               | 767    |
| dastelefonbuch    | 210    | spiegel              | 11999  | rosenheim24       | 662    |
| reddit            | 209    | gutefrage            | 10758  | br                | 607    |
| feedly            | 133    | handelsblatt         | 9698   | rtl               | 437    |
| carookee          | 124    | wikipedia            | 9287   | sat1              | 156    |
| wikia             | 114    | faz                  | 8810   | ard               | 99     |
| foodsharing       | 105    | finanznachrichten    | 7279   |                   |        |
| ariva             | 104    | tagesschau           | 6712   |                   |        |
| mamikreisel       | 83     | bayern               | 5848   |                   |        |
| zauberhogwarts    | 29     | zdf                  | 5544   |                   |        |
| skatstube         | 7      | n-tv                 | 5451   |                   |        |
|                   |        | bing                 | 4957   |                   |        |
|                   |        | sputniknews          | 3993   |                   |        |
|                   |        | change               | 3437   |                   |        |
|                   |        | sueddeutsche         | 2820   |                   |        |
|                   |        | stern                | 2403   |                   |        |
|                   |        | tagesspiegel         | 2237   |                   |        |
|                   |        | lvz                  | 2078   |                   |        |
|                   |        | express              | 1812   |                   |        |
|                   |        | gelbeseiten          | 1712   |                   |        |
|                   |        | chip                 | 1356   |                   |        |
|                   |        | huffingtonpost       | 1345   |                   |        |
|                   |        | wize                 | 1282   |                   |        |
|                   |        | anisearch            | 1280   |                   |        |
|                   |        | ardmediathek         | 1242   |                   |        |

*Note.* Classes of domains according to predicted probabilities of class membership, sorted by clicks in the sample.



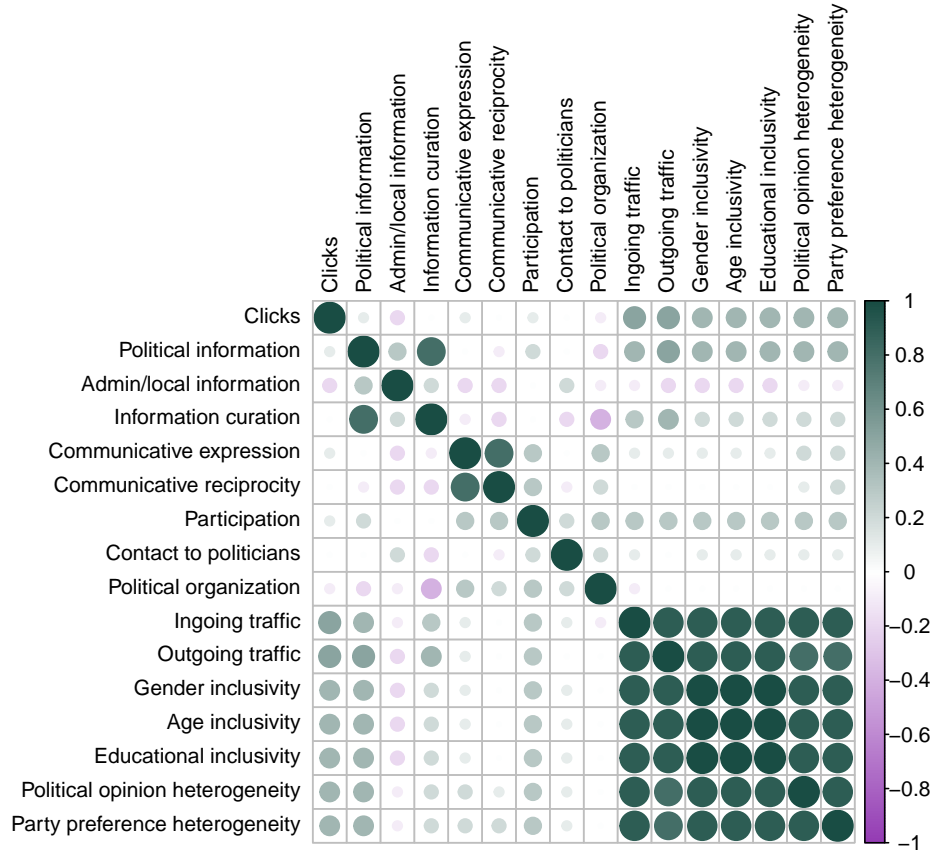

**Figure C5**

Correlation table between different Deliberative Potential criteria. Black squares indicate criteria that belong to one dimension.

**Table C2**

*Latent Class Model Comparison*

| Model    | Log Likelihoods | Df  | BIC  | aBIC | AIC  | Likelihood Ratios |
|----------|-----------------|-----|------|------|------|-------------------|
| model 1  | -651            | 54  | 1365 | 1318 | 1380 | 833               |
| model 2  | -408            | 38  | 948  | 850  | 979  | 348               |
| model 3  | -376            | 22  | 951  | 803  | 998  | 283               |
| model 4  | -353            | 6   | 972  | 774  | 1035 | 237               |
| model 5  | -337            | -10 | 1009 | 760  | 1088 | 206               |
| model 6  | -321            | -26 | 1045 | 746  | 1140 | 174               |
| model 7  | -312            | -42 | 1094 | 744  | 1205 | 155               |
| model 8  | -301            | -58 | 1139 | 739  | 1266 | 133               |
| model 9  | -295            | -74 | 1195 | 744  | 1338 | 121               |
| model 10 | -285            | -90 | 1244 | 743  | 1403 | 102               |

*Note.* Model number represents number of latent classes. Values rounded to integers.

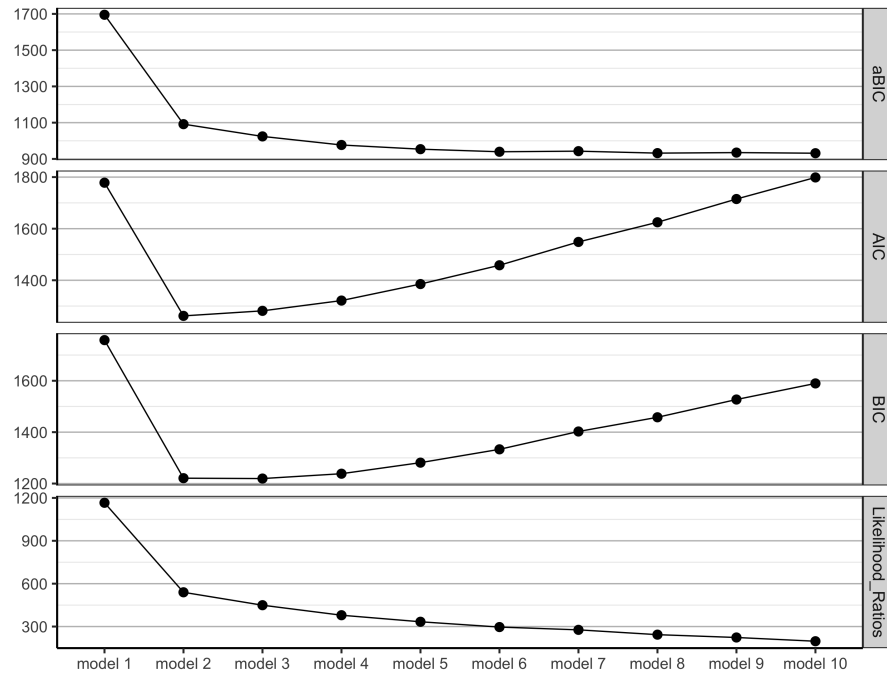

**Figure C6**

*Elbow plot - Latent Class Analysis Model Fit Comparison*

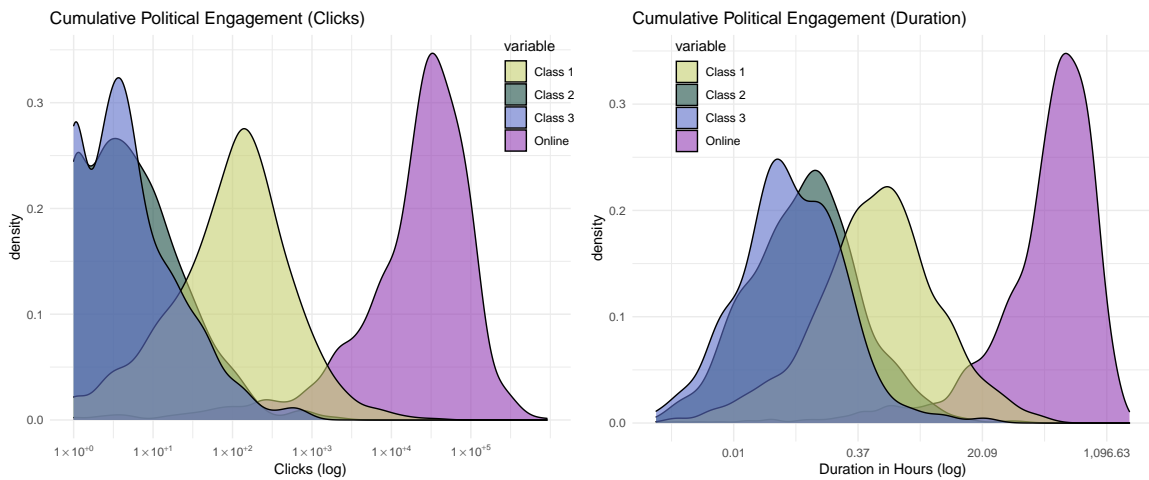

(a) *Engagement with classes of sites (clicks, raw)* (b) *Engagement with classes of sites (duration, raw)*

**Table C3***Class Memberships - Two-class solution*

| C1_domains           | clicks | C2_domains        | clicks |
|----------------------|--------|-------------------|--------|
| google               | 102926 | elo-forum         | 1208   |
| news-und-nachrichten | 49265  | heute             | 1179   |
| bild                 | 36771  | computerbild      | 1151   |
| facebook             | 31592  | swr               | 1129   |
| wahl-o-mat           | 30046  | suedkurier        | 1068   |
| msn                  | 29460  | ksta              | 1040   |
| focus                | 27413  | schwaebische      | 912    |
| welt                 | 18819  | daserste          | 896    |
| twitter              | 17566  | berlin            | 894    |
| zeit                 | 16609  | wdr               | 883    |
| spiegel              | 11999  | duckduckgo        | 845    |
| gutefrage            | 10758  | ndr               | 831    |
| handelsblatt         | 9698   | ecosia            | 807    |
| wikipedia            | 9287   | wordpress         | 785    |
| faz                  | 8810   | mdr               | 767    |
| finanznachrichten    | 7279   | wallstreet-online | 711    |
| tagesschau           | 6712   | rosenheim24       | 662    |
| bayern               | 5848   | onvista           | 646    |
| zdf                  | 5544   | br                | 607    |
| n-tv                 | 5451   | gamestar          | 595    |
| bing                 | 4957   | rtl               | 437    |
| sputniknews          | 3993   | esoterikforum     | 253    |
| change               | 3437   | instagram         | 228    |
| sueddeutsche         | 2820   | dastelefonbuch    | 210    |
| stern                | 2403   | reddit            | 209    |
| tagesspiegel         | 2237   | sat1              | 156    |
| lvz                  | 2078   | feedly            | 133    |
| express              | 1812   | carookee          | 124    |
| gelbeseiten          | 1712   | wikia             | 114    |
| chip                 | 1356   | foodsharing       | 105    |
| huffingtonpost       | 1345   | ariva             | 104    |
| wize                 | 1282   | ard               | 99     |
| anisearch            | 1280   | mamikreisel       | 83     |
| ardmediathek         | 1242   | zauberhogwarts    | 29     |
|                      |        | skatstube         | 7      |

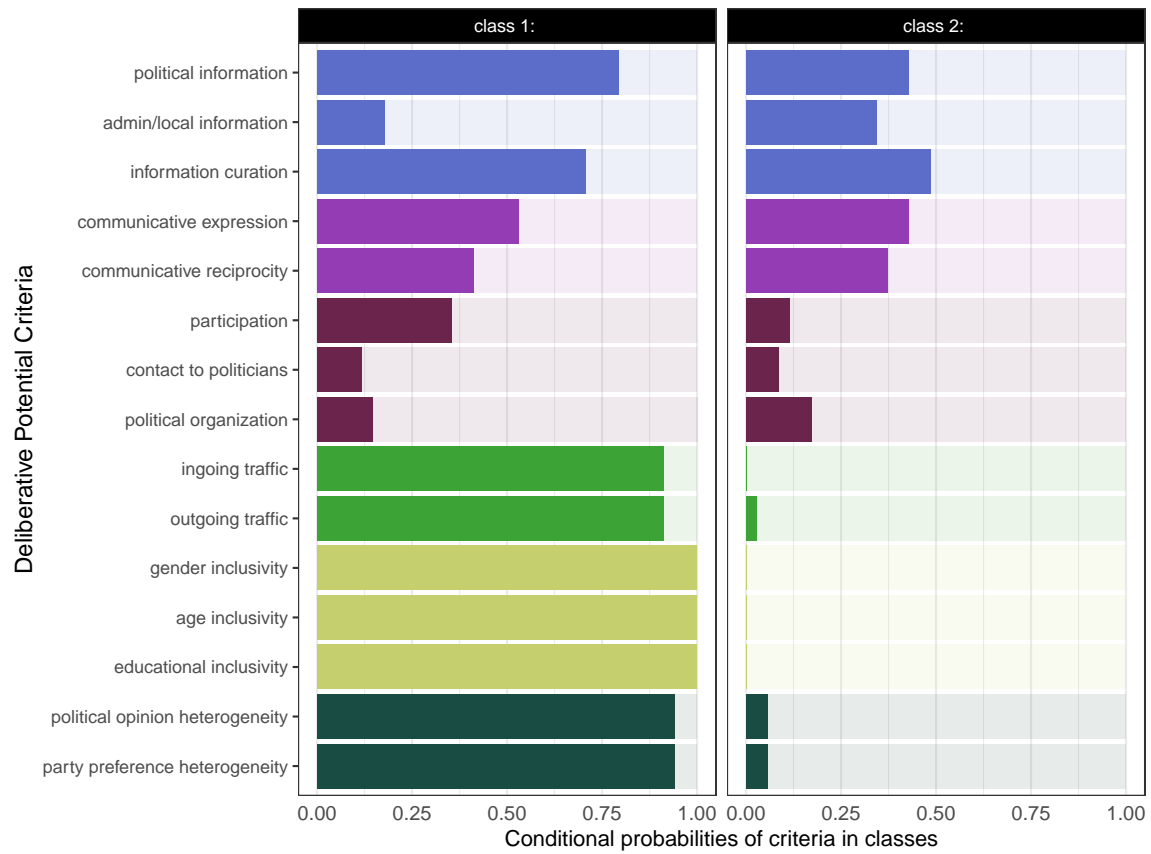

**Figure C8**

*Conditional response probabilities, by deliberative potential criterion, of belonging to each latent class - Two-class solution.*

**Table C4**

*Fit criteria - Hand coded infrastructure only*

| Model    | Log_Likelihoods | Df  | BIC | aBIC | AIC | Likelihood_Ratios |
|----------|-----------------|-----|-----|------|-----|-------------------|
| model 1  | -317            | 61  | 667 | 642  | 675 | 228               |
| model 2  | -276            | 52  | 625 | 571  | 642 | 147               |
| model 3  | -255            | 43  | 620 | 538  | 646 | 105               |
| model 4  | -238            | 34  | 624 | 514  | 659 | 71                |
| model 5  | -227            | 25  | 640 | 501  | 684 | 48                |
| model 6  | -221            | 16  | 666 | 499  | 719 | 36                |
| model 7  | -216            | 7   | 694 | 499  | 756 | 27                |
| model 8  | -213            | -2  | 727 | 503  | 798 | 21                |
| model 9  | -210            | -11 | 758 | 507  | 838 | 15                |
| model 10 | -207            | -20 | 792 | 511  | 881 | 10                |

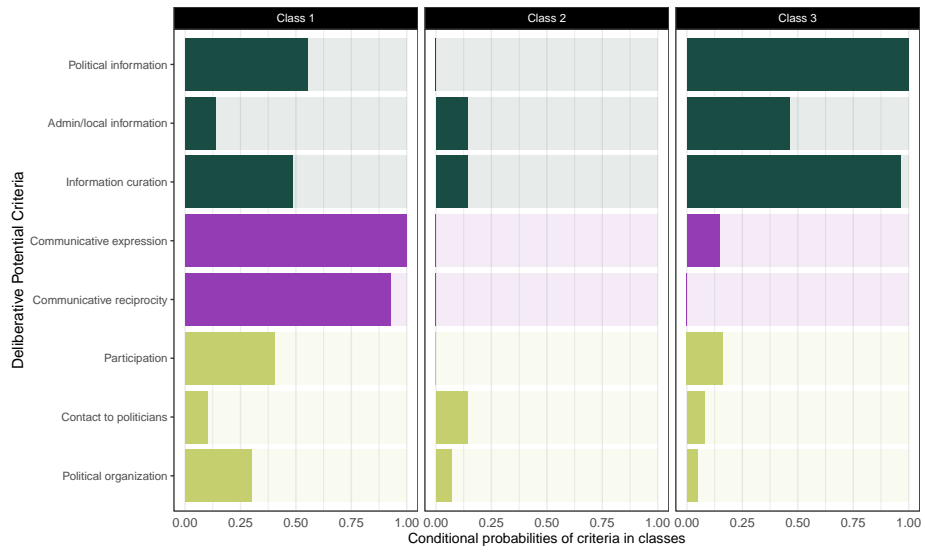

**Figure C9**

*Hand coded criteria only.*

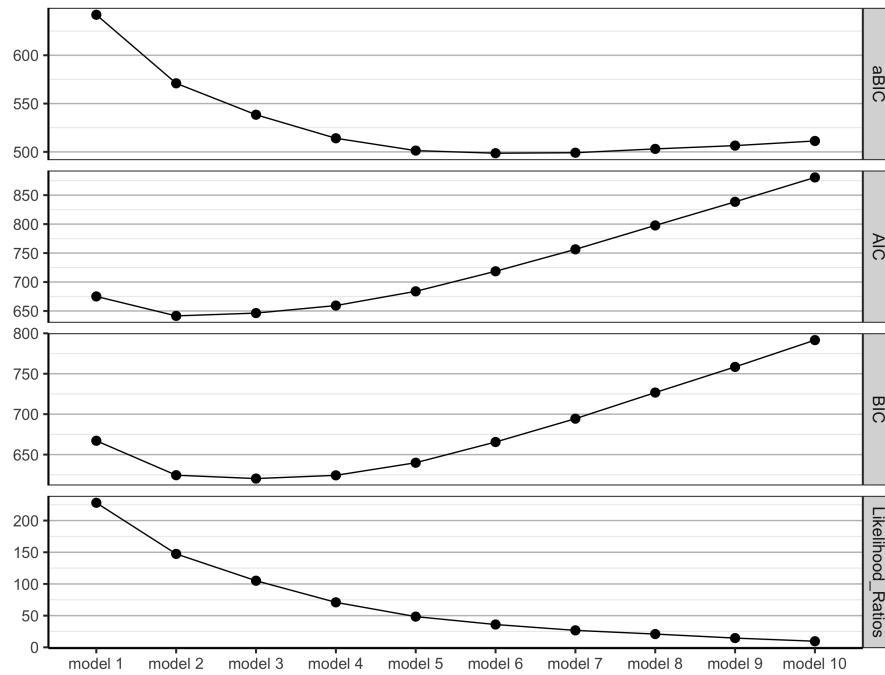

**Figure C10**

*Elbow plot - Latent Class Analysis Model Fit Comparison - Hand coded criteria only*

**Table C5***Class Memberships - Hand coded criteria only*

| C1_domains   | clicks | C2_domains        | clicks | C3_domains        | clicks |
|--------------|--------|-------------------|--------|-------------------|--------|
| wahl-o-mat   | 30046  | google            | 102926 | bild              | 36771  |
| msn          | 29460  | finanznachrichten | 7279   | facebook          | 31592  |
| wikipedia    | 9287   | bing              | 4957   | focus             | 27413  |
| tagesschau   | 6712   | gelbeseiten       | 1712   | twitter           | 17566  |
| bayern       | 5848   | chip              | 1356   | zeit              | 16609  |
| zdf          | 5544   | computerbild      | 1151   | spiegel           | 11999  |
| n-tv         | 5451   | duckduckgo        | 845    | gutefrage         | 10758  |
| stern        | 2403   | ecosia            | 807    | faz               | 8810   |
| lvz          | 2078   | wordpress         | 785    | sputniknews       | 3993   |
| express      | 1812   | onvista           | 646    | sueddeutsche      | 2820   |
| ardmediathek | 1242   | dastelefonbuch    | 210    | tagesspiegel      | 2237   |
| swr          | 1129   | feedly            | 133    | huffingtonpost    | 1345   |
| suedkurier   | 1068   | foodsharing       | 105    | wize              | 1282   |
| ksta         | 1040   | ariva             | 104    | anisearch         | 1280   |
| daserste     | 896    |                   |        | elo-forum         | 1208   |
| berlin       | 894    |                   |        | heute             | 1179   |
| wdr          | 883    |                   |        | wallstreet-online | 711    |
| ndr          | 831    |                   |        | rosenheim24       | 662    |
| mdr          | 767    |                   |        | br                | 607    |
| rtl          | 437    |                   |        | gamestar          | 595    |
| sat1         | 156    |                   |        | esoterikforum     | 253    |
| ard          | 99     |                   |        | instagram         | 228    |
|              |        |                   |        | reddit            | 209    |
|              |        |                   |        | carookee          | 124    |
|              |        |                   |        | wikia             | 114    |
|              |        |                   |        | mamikreisel       | 83     |
|              |        |                   |        | zauberhogwarts    | 29     |
|              |        |                   |        | skatstube         | 7      |

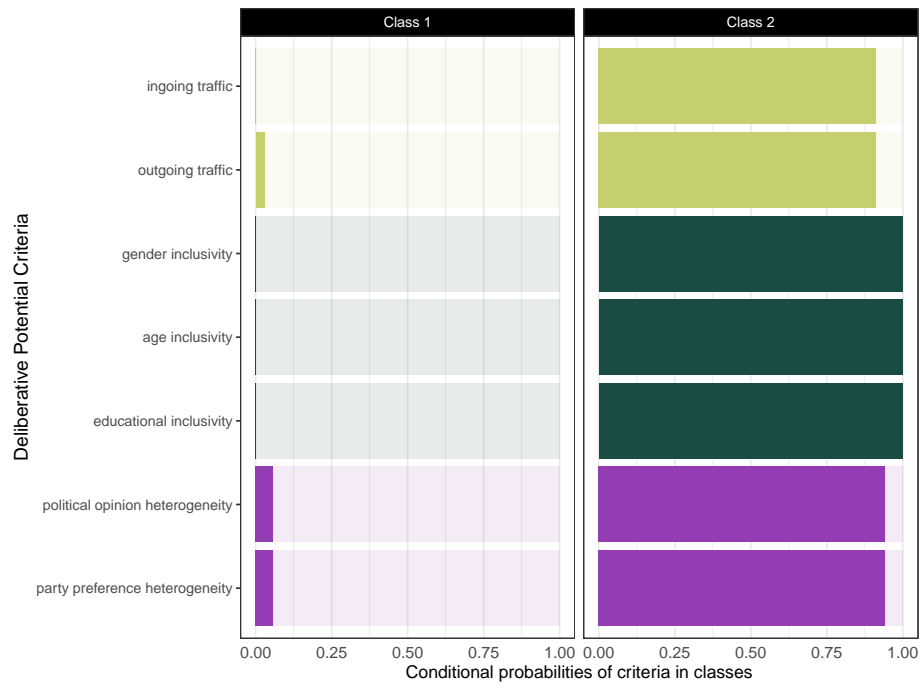

**Figure C11**

*Computationally coded criteria only.*

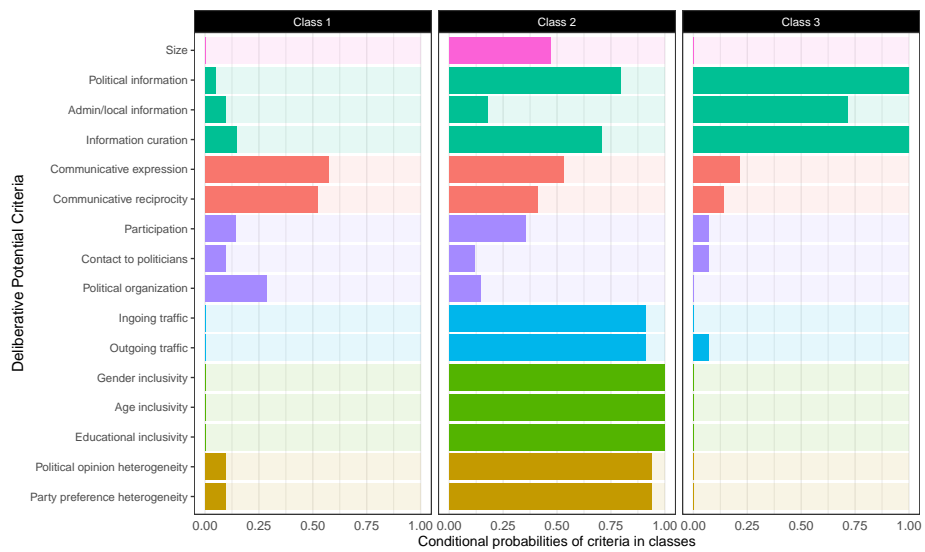

**Figure C12**

*Website size (measured in clicks) added as additional criterion.*

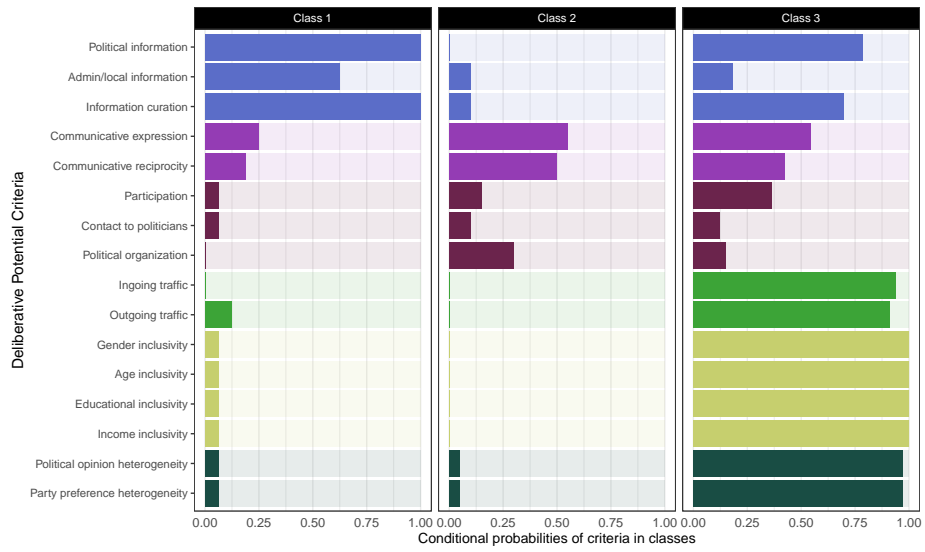

Figure C13

Household income added as additional criterion for inclusivity.

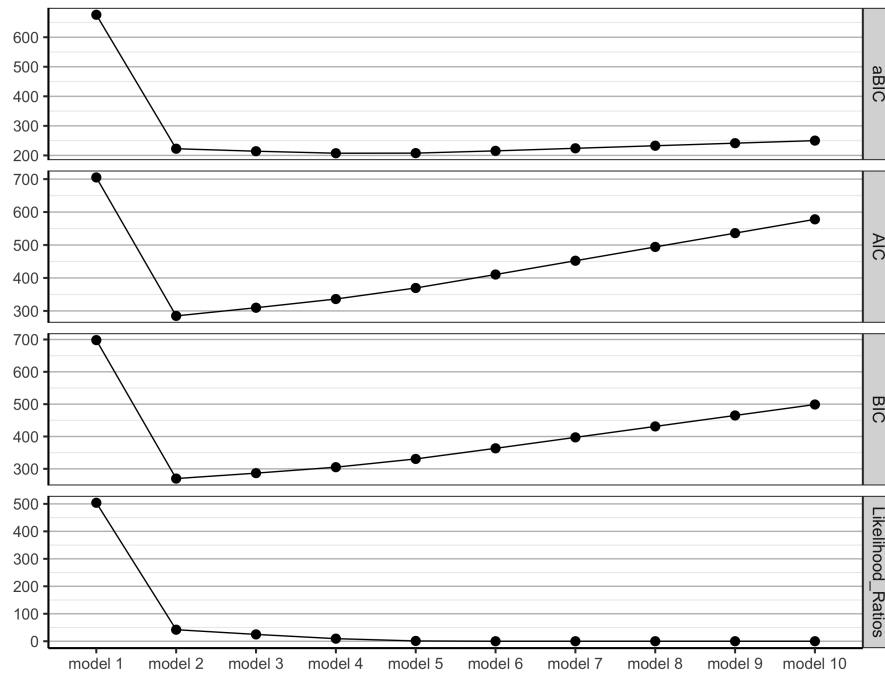

Figure C14

Elbow plot - Latent Class Analysis Model Fit Comparison - Demand criteria only



**Table C6**

*Fit criteria - Computationally coded engagement based criteria only*

| Model    | Log_Likelihoods | Df  | BIC | aBIC | AIC | Likelihood_Ratios |
|----------|-----------------|-----|-----|------|-----|-------------------|
| model 1  | -334            | 62  | 698 | 676  | 705 | 504               |
| model 2  | -103            | 54  | 270 | 223  | 285 | 42                |
| model 3  | -95             | 46  | 287 | 214  | 310 | 25                |
| model 4  | -87             | 38  | 305 | 207  | 336 | 9                 |
| model 5  | -83             | 30  | 331 | 208  | 370 | 1                 |
| model 6  | -82             | 22  | 363 | 215  | 410 | 0                 |
| model 7  | -82             | 14  | 397 | 224  | 452 | 0                 |
| model 8  | -82             | 6   | 431 | 233  | 494 | 0                 |
| model 9  | -82             | -2  | 465 | 241  | 536 | 0                 |
| model 10 | -82             | -10 | 499 | 250  | 578 | 0                 |

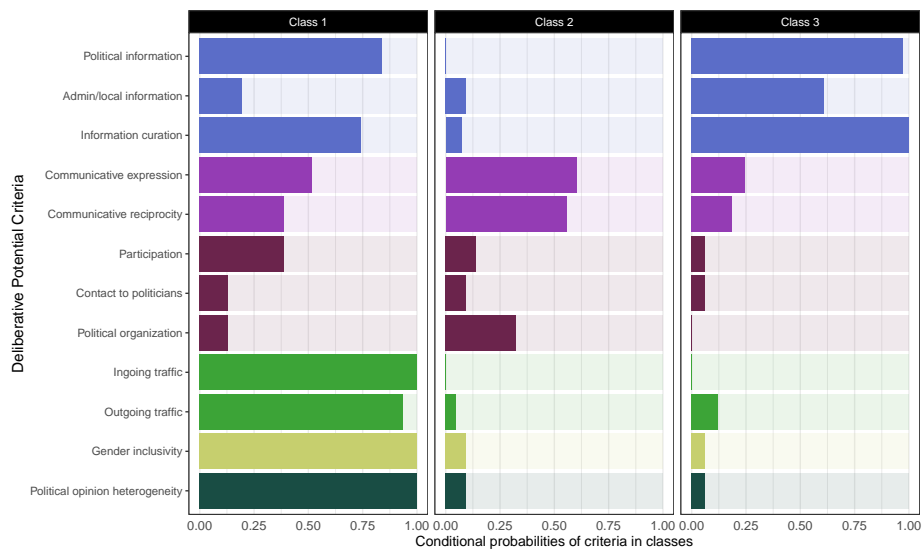

**Figure C15**

*Solution with 3 criteria dropped from the sample.*

**Table C7***Class Memberships - Computationally coded criteria only*

| C1_domains           | clicks | C2_domains        | clicks |
|----------------------|--------|-------------------|--------|
| google               | 102926 | elo-forum         | 1208   |
| news-und-nachrichten | 49265  | heute             | 1179   |
| bild                 | 36771  | computerbild      | 1151   |
| facebook             | 31592  | swr               | 1129   |
| wahl-o-mat           | 30046  | suedkurier        | 1068   |
| msn                  | 29460  | ksta              | 1040   |
| focus                | 27413  | schwaebische      | 912    |
| welt                 | 18819  | daserste          | 896    |
| twitter              | 17566  | berlin            | 894    |
| zeit                 | 16609  | wdr               | 883    |
| spiegel              | 11999  | duckduckgo        | 845    |
| gutefrage            | 10758  | ndr               | 831    |
| handelsblatt         | 9698   | ecosia            | 807    |
| wikipedia            | 9287   | wordpress         | 785    |
| faz                  | 8810   | mdr               | 767    |
| finanznachrichten    | 7279   | wallstreet-online | 711    |
| tagesschau           | 6712   | rosenheim24       | 662    |
| bayern               | 5848   | onvista           | 646    |
| zdf                  | 5544   | br                | 607    |
| n-tv                 | 5451   | gamestar          | 595    |
| bing                 | 4957   | rtl               | 437    |
| sputniknews          | 3993   | esoterikforum     | 253    |
| change               | 3437   | instagram         | 228    |
| sueddeutsche         | 2820   | dastelefonbuch    | 210    |
| stern                | 2403   | reddit            | 209    |
| tagesspiegel         | 2237   | sat1              | 156    |
| lvz                  | 2078   | feedly            | 133    |
| express              | 1812   | carookee          | 124    |
| gelbeseiten          | 1712   | wikia             | 114    |
| chip                 | 1356   | foodsharing       | 105    |
| huffingtonpost       | 1345   | ariva             | 104    |
| wize                 | 1282   | ard               | 99     |
| anisearch            | 1280   | mamikreisel       | 83     |
| ardmediathek         | 1242   | zauberhogwarts    | 29     |
|                      |        | skatstube         | 7      |

**Table C8**

*Model Fit - Three criteria dropped*

| Model    | Log Likelihoods | Df  | BIC  | aBIC | AIC  | Likelihood Ratios |
|----------|-----------------|-----|------|------|------|-------------------|
| model 1  | -507            | 57  | 1066 | 1028 | 1078 | 546               |
| model 2  | -389            | 44  | 883  | 804  | 908  | 309               |
| model 3  | -352            | 31  | 866  | 746  | 904  | 236               |
| model 4  | -330            | 18  | 876  | 715  | 927  | 191               |
| model 5  | -313            | 5   | 896  | 695  | 960  | 157               |
| model 6  | -303            | -8  | 931  | 689  | 1008 | 136               |
| model 7  | -294            | -21 | 970  | 686  | 1060 | 120               |
| model 8  | -285            | -34 | 1006 | 682  | 1109 | 102               |
| model 9  | -278            | -47 | 1048 | 683  | 1164 | 88                |
| model 10 | -274            | -60 | 1093 | 687  | 1222 | 79                |

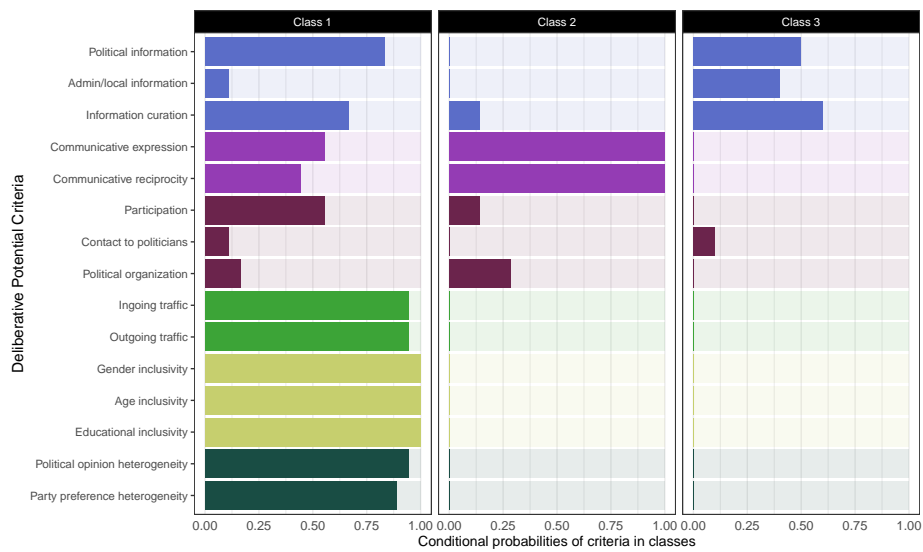

**Figure C16**

*Solution with 50% split sample.*

**Table C9***Class Memberships - dropped 3 criteria*

| C1_domains     | clicks | C2_domains           | clicks | C3_domains   | clicks |
|----------------|--------|----------------------|--------|--------------|--------|
| wize           | 1282   | google               | 102926 | ardmediathek | 1242   |
| anisearch      | 1280   | news-und-nachrichten | 49265  | heute        | 1179   |
| elo-forum      | 1208   | bild                 | 36771  | swr          | 1129   |
| computerbild   | 1151   | facebook             | 31592  | suedkurier   | 1068   |
| duckduckgo     | 845    | wahl-o-mat           | 30046  | ksta         | 1040   |
| ecosia         | 807    | msn                  | 29460  | schwaebische | 912    |
| wordpress      | 785    | focus                | 27413  | daserste     | 896    |
| onvista        | 646    | welt                 | 18819  | berlin       | 894    |
| gamestar       | 595    | twitter              | 17566  | wdr          | 883    |
| esoterikforum  | 253    | zeit                 | 16609  | ndr          | 831    |
| instagram      | 228    | spiegel              | 11999  | mdr          | 767    |
| dastelefonbuch | 210    | gutefrage            | 10758  | rosenheim24  | 662    |
| reddit         | 209    | handelsblatt         | 9698   | br           | 607    |
| feedly         | 133    | wikipedia            | 9287   | rtl          | 437    |
| carookee       | 124    | faz                  | 8810   | sat1         | 156    |
| wikia          | 114    | finanznachrichten    | 7279   | ard          | 99     |
| foodsharing    | 105    | tagesschau           | 6712   |              |        |
| mamikreisel    | 83     | bayern               | 5848   |              |        |
| zauberhogwarts | 29     | zdf                  | 5544   |              |        |
| skatstube      | 7      | n-tv                 | 5451   |              |        |
|                |        | bing                 | 4957   |              |        |
|                |        | sputniknews          | 3993   |              |        |
|                |        | change               | 3437   |              |        |
|                |        | sueddeutsche         | 2820   |              |        |
|                |        | stern                | 2403   |              |        |
|                |        | tagesspiegel         | 2237   |              |        |
|                |        | lvz                  | 2078   |              |        |
|                |        | express              | 1812   |              |        |
|                |        | gelbeseiten          | 1712   |              |        |
|                |        | chip                 | 1356   |              |        |
|                |        | huffingtonpost       | 1345   |              |        |

**Table C10***Model Fit - Split Sample (50%)*

| Model    | Log Likelihoods | Df   | BIC | aBIC | AIC | Likelihood Ratios |
|----------|-----------------|------|-----|------|-----|-------------------|
| model 1  | -312            | 20   | 678 | 631  | 693 | 425               |
| model 2  | -180            | 4    | 471 | 374  | 502 | 161               |
| model 3  | -164            | -12  | 495 | 348  | 542 | 127               |
| model 4  | -149            | -28  | 522 | 325  | 585 | 98                |
| model 5  | -140            | -44  | 561 | 314  | 640 | 80                |
| model 6  | -131            | -60  | 600 | 303  | 695 | 62                |
| model 7  | -124            | -76  | 643 | 297  | 754 | 49                |
| model 8  | -119            | -92  | 690 | 293  | 817 | 38                |
| model 9  | -115            | -108 | 739 | 292  | 882 | 30                |
| model 10 | -112            | -124 | 788 | 292  | 947 | 23                |

**Table C11***Class Memberships - Split Sample (N = 35 domains)*

| C1_domains        | clicks | C2_domains     | clicks | C3_domains  | clicks |
|-------------------|--------|----------------|--------|-------------|--------|
| google            | 102926 | computerbild   | 1151   | swr         | 1129   |
| facebook          | 31592  | duckduckgo     | 845    | suedkurier  | 1068   |
| wahl-o-mat        | 30046  | ecosia         | 807    | rosenheim24 | 662    |
| msn               | 29460  | onvista        | 646    | br          | 607    |
| welt              | 18819  | esoterikforum  | 253    | sat1        | 156    |
| handelsblatt      | 9698   | instagram      | 228    | ard         | 99     |
| wikipedia         | 9287   | reddit         | 209    |             |        |
| finanznachrichten | 7279   | feedly         | 133    |             |        |
| tagesschau        | 6712   | foodsharing    | 105    |             |        |
| bayern            | 5848   | zauberhogwarts | 29     |             |        |
| n-tv              | 5451   |                |        |             |        |
| bing              | 4957   |                |        |             |        |
| change            | 3437   |                |        |             |        |
| sueddeutsche      | 2820   |                |        |             |        |
| tagesspiegel      | 2237   |                |        |             |        |
| lvz               | 2078   |                |        |             |        |
| express           | 1812   |                |        |             |        |
| gelbeseiten       | 1712   |                |        |             |        |
| anisearch         | 1280   |                |        |             |        |

**Table C12***Top 1000 domains - categories*

| Domain       | Category | Clicks   | Domain        | Category | Clicks |
|--------------|----------|----------|---------------|----------|--------|
| survey       |          | 10359976 | tracking      |          | 392589 |
| social_media |          | 6016296  | messenger     |          | 269634 |
| mail         |          | 5525976  | information   |          | 238403 |
| shopping     |          | 5183965  | networking    |          | 160659 |
| search       |          | 4475112  | tv            |          | 131309 |
| micro_job    |          | 3752463  | travel        |          | 120034 |
| gaming       |          | 2244070  | sport         |          | 109112 |
| function     |          | 1418048  | work          |          | 99610  |
| news         |          | 1077675  | participation |          | 65411  |
| streaming    |          | 945883   | transport     |          | 60278  |
| porn         |          | 779554   | uni           |          | 46372  |
| gambling     |          | 575798   | cooking       |          | 43618  |
| banking      |          | 563014   | radio         |          | 38112  |
| cashback     |          | 548676   | blog          |          | 25754  |
| forum        |          | 497458   | file-hosting  |          | 25535  |
| dating       |          | 440430   | astrology     |          | 13759  |
| hobby        |          | 395972   | counseling    |          | 7484   |

**Table C13***Political Topics*

|    | Topic (group)          | clicks |
|----|------------------------|--------|
| 1  | Politics and citizens  | 126542 |
| 2  | News                   | 76534  |
| 3  | Election               | 46357  |
| 4  | Employment             | 24141  |
| 5  | Parties                | 23237  |
| 6  | Finance                | 21699  |
| 7  | Politicians            | 10548  |
| 8  | Justice                | 9247   |
| 9  | Science and Journalism | 8708   |
| 10 | Social Issues          | 7774   |
| 11 | Governance             | 6904   |
| 12 | Health and Pension     | 6547   |
| 13 | Safety and Security    | 6018   |
| 14 | Government             | 5114   |
| 15 | International Politics | 5094   |
| 16 | Environmental Issues   | 5080   |
| 17 | US Politics            | 4294   |
| 18 | Migration              | 3468   |
| 19 | Infrastructure         | 2950   |
| 20 | Housing                | 1137   |
| 21 | Brexit                 | 657    |

## Appendix D

### Websites for political keyword selection

- [https://de.wikipedia.org/wiki/Bundestagswahl\\_2017](https://de.wikipedia.org/wiki/Bundestagswahl_2017)
- <https://www.bpb.de/politik/hintergrund-aktuell/261923/rueckblick-2017>
- <https://www.sueddeutsche.de/politik/jahresrueckblick-die-politischen-momente-2017-1.3802865>
- <https://interaktiv.morgenpost.de/probleme-bundestagswahl-2017/>
- <https://de.statista.com/infografik/10787/wichtige-themen-bei-der-bundestagswahl/>
- <https://www.bpb.de/politik/hintergrund-aktuell/256110/bundestagswahl>
- <https://www.bertelsmann-stiftung.de/de/themen/aktuelle-meldungen/2017/oktober/bundestagswahl-2017-wahlergebnis-zeigt-neue-konfliktlinie-der-demokratie/>
- <https://web.de/magazine/politik/wahlen/bundestagswahl/bundestagswahl-2017-themen-entscheiden-wahlkampf-32540410>

### Political Keyword Dictionary

Inclusion = (abgabe,abgeordnete , abkommen , administrat , adoption , afd , altmaier , anteil , arbeit , armut , asyl , ausbau , auslaend , ausland , auslaend , auszaehlung , autorit , b%C3%BCndnis , b%C3%BCrger , bangladesch , bartsch , behoerd , berechtigt , beteilig , betreuung , betrug , bezirk , bildung , bombe , brandner , brexit , bruessel , buendnis , buerger , bundes , bündnis , bürger , cdu , christlich , clinton , delegiert , demokrat , digitalisier , diplomat , divers , einwander , energiewende , erdogan , erwerbslos , europäisch , feindlich , feminis , finanz , flücht , fluecht , fraktion , freiheit , gauland , gaza , gesellschaft , gesetz , gleichberechtigung , glyphosat , göring , gr%C3%BCne , greenpeace , groko , gruene , grundeinkommen , grundordnung , grüne , hagedorn , hamas , handel , hartz , hochrechnung , homoehe , infrastruktur , integration , investigativ , israel , jamaika , jerusalem , journalis , jugoslawien , justiz , kabinett , kampagne , kandidat , kanzler , katalan , katalon , kipping , kita , klausel , klima , koalition , komission , kompromiss , konflikt , kongress , konservativ , konzern , kriminal , kriminell , krise , kritiker , l%C3%B6hne , leyen , liberal , lindner , linke , loehne , lohn , löhne , maas , macron , maiziere , maizièrè , mecklemburg , mehrheit , merkel , mietpreis , migrant , migration , milieu , militär , minister , mobilisier , modernisier , mugabe , muslim , myanmar , nahles , nordkorea , nordrhein , notlage , notstand , oezdemir , %C3%B6zdemir , opposition , organisat , özdemir , pal%C3%A4stin , palaestin , palästín , parlament , partei , petition , petry , plakat , politbarometer , politi , populist , pr%C3%A4sident , praesident , präsidient , präsidial , prek%C3%A4r , prekaer , prekär , president , propaganda , protektionis , protest , putsch , radikal , rakete , rassismus , recht , referendum , reform , regier , regional , rente , reporter , repression , republik , rheinland , richtlinie , rohingya , rutte , sanktion , sch%C3%A4uble , schaeuble , schäuble , schulz , seehofer , sicherheit , simbabwe , skepti , sondierung , sonntagsfrage , sozial , spaltung , spd , sperrklausel , staat , statistik , steinmeier , steuer , stimme , storch , terror , trump , umwelt , unabh%C3%A4ngig , unabaengig , unabhängig , ungerecht , unterhaus



, unterschrift , untersuch , v%C3%B6lker , verantwort , verbrechen , verfassung , verhalten , verhandlung , verkehrswende , verordnung , versammlung , versorg , verteil , voelker , volk , völker , vorsitz , vorsorge , w%C3%A4hl , waehl , wagenknecht , wahl , wähl , wandel , washington , weidel , wende , wiedereinzug , wiedervereinigung , wilders , wirtschaft , wissenschaft , y%C3%BCcel , yücel , yuecel , zulassung)

Exclusion = (bundesliga, competition, auswahl, steuerberat, reitbeteiligung, gravi-tationsgesetz, robotergesetz, zickenkrieg, ausbildung, bearbeiten, schulze, kitarou)

## Appendix E

### Software Statement

The entire analysis was run under OS X 10.13.6 using R version 4.0.4 (2021-02-15) (R Core Team, 2018). In the empirical analysis, I made use of the following R software packages:

dplyr (Wickham & Francois, 2015),  
 ggplot2 (Wickham, 2016),  
 readr (Wickham et al., 2017),  
 readxl (Wickham & Bryan, 2018) ,  
 writexl (Ooms, 2018) ,  
 urltools (Keyes et al., 2019),  
 tidyverse (Wickham et al., 2019),  
 xtable(Dahl, 2016) ,  
 sf (Pebesma et al., 2018),  
 tidyLPA(Rosenberg et al., 2019),  
 vegan(Dixon, 2003),  
 poLCA(Linzer & Lewis, 2011)  
 gdata(Warnes et al., 2015)  
 knitr(Xie, 2018)  
 kableExtra(Zhu, 2019)  
 igraph(Csardi & Nepusz, 2006)  
 gridExtra(Auguie & Antonov, 2017)  
 panelr(Long, 2021)  
 jcolors(Huling, 2019)

## Code Book – Deliberative Potential Index

Unit of Analysis: Website / Domain

| Dimension                        | Operational Definition                                                                                                                                                                                   | Criterion                                                                                                                                                                                                                                                                   | Measurement                                                                                                                                 | Reference                                                                                                                                               |
|----------------------------------|----------------------------------------------------------------------------------------------------------------------------------------------------------------------------------------------------------|-----------------------------------------------------------------------------------------------------------------------------------------------------------------------------------------------------------------------------------------------------------------------------|---------------------------------------------------------------------------------------------------------------------------------------------|---------------------------------------------------------------------------------------------------------------------------------------------------------|
| <b>Information</b>               | Users can find political information on this website. Such sites serve as resource for opinion and will-formation.                                                                                       | <ol style="list-style-type: none"> <li>1. Provides information on political issues, actors and institutions</li> <li>2. Provides administrative or local information</li> <li>3. Acts as primary or (journalistically) curated source of information<sup>1</sup></li> </ol> | Human rating (binary 0/1) for each criterion                                                                                                | Wiklund (2005), Esau et al. (2020)                                                                                                                      |
| <b>Communication</b>             | The website provides users with the possibility to express and/or exchange political opinions with other users. Such sites serve as communicative spaces for (interactional) opinion and will-formation. | <ol style="list-style-type: none"> <li>1. Enables commenting / political expression (and potentially ratings of comments)</li> <li>2. Enables reciprocity / replies to comments of other users (open replies, not only ratings)</li> </ol>                                  | Human rating (binary 0/1) for each criterion                                                                                                | Wiklund (2005), Esau et al. (2020)                                                                                                                      |
| <b>Participation</b>             | The website provides users with the possibility of online political participation or organization, implying a potential (direct) impact on political decision making.                                    | <ol style="list-style-type: none"> <li>1. Enables contact to political actors</li> <li>2. Enables political participation (petitions, polls, etc.)</li> <li>3. Enables political organization (events, groups, etc.)</li> </ol>                                             | Human rating (binary 0/1) for each criterion                                                                                                | Contact to politicians: Wiklund (2005), Polls: Richardson & Stanyer (2011), function for decision making/ aggregation of interests: Esau et al. (2020), |
| <b>Isolation (Connectivity)</b>  | The website is connected to other relevant websites. This facilitates further research on political issues or the implementation of intentions of political participation.                               | <ol style="list-style-type: none"> <li>1. Contains links to other politically relevant websites</li> </ol>                                                                                                                                                                  | <ol style="list-style-type: none"> <li>a) Human rating (binary 0/1)</li> <li>b) Network centrality, in/outgoing relevant traffic</li> </ol> |                                                                                                                                                         |
| <b>Inclusivity<sup>2</sup></b>   | The website is used by a comparably diverse set of individuals. This dimension serves as indicator for low barriers of access.                                                                           | <ol style="list-style-type: none"> <li>1. Educational backgrounds</li> <li>2. Gender</li> <li>3. Age</li> </ol>                                                                                                                                                             | Quantitative assessment using web-tracking data in combination with survey information                                                      | Mansbridge & Parkinson (2012) / democratic function                                                                                                     |
| <b>Heterogeneity<sup>2</sup></b> | The website connects people holding a comparably wide range of political opinions. This stands in contrast to the notion of ideological online 'echo chambers'.                                          | <ol style="list-style-type: none"> <li>1. Political orientation</li> <li>2. Party preferences</li> </ol>                                                                                                                                                                    | Quantitative assessment using web-tracking data in combination with survey information                                                      | Mansbridge & Parkinson (2012) / democratic function                                                                                                     |

<sup>1</sup> Curation representing a basic form of fact checking taking place (no obvious misinformation or strong opinion statements presented as factual statements)

<sup>2</sup> Optional category as only possible to assess with digital trace data + survey information)
